# Supplementary material
Source: PubMed Central journal article supplement (PMC5907834)
Supplement: supplementarymaterial.pdf [file supplementarymaterial.pdf]

**Supplementary Table S1: Gene pairs with significant tendency for co-occurrence by association.**

| geneA   | geneB  | p-Value          | Log Odds Ratio | Association                                               |
|---------|--------|------------------|----------------|-----------------------------------------------------------|
| ZH2     | KMT2C  | <b>&lt;0.001</b> | 2.084          | Tendency towards co-occurrence( <b>Significant</b> )      |
| ZH2     | CDKN2A | <b>&lt;0.001</b> | 1.506          | Tendency towards co-occurrence( <b>Significant</b> )      |
| EZH2    | CIC    | 0.055            | -0.954         | Tendency towards mutual exclusivity                       |
| EZH2    | EGFR   | 0.049            | 0.889          | Tendency towards co-occurrence( <b>Significant</b> )      |
| EZH2    | PIK3CA | 0.095            | 0.707          | Tendency towards co-occurrence                            |
| EZH2    | TP53   | 0.028            | 0.893          | Tendency towards co-occurrence( <b>Significant</b> )      |
| CHD4    | TFPT   | 0.003            | 1.571          | Tendency towards co-occurrence( <b>Significant</b> )      |
| CHD4    | KDM5A  | <b>&lt;0.001</b> | 2.612          | Tendency towards co-occurrence( <b>Significant</b> )      |
| CHD4    | ATRX   | 0.015            | 0.821          | Tendency towards co-occurrence( <b>Significant</b> )      |
| CHD4    | EGFR   | 0.031            | -1.379         | Tendency towards mutual exclusivity( <b>Significant</b> ) |
| CHD4    | MYC    | 0.017            | 1.023          | Tendency towards co-occurrence( <b>Significant</b> )      |
| CHD4    | TP53   | 0.005            | 0.994          | Tendency towards co-occurrence( <b>Significant</b> )      |
| KMT2C   | KDM5A  | 0.056            | 0.851          | Tendency towards co-occurrence                            |
| KMT2C   | ATRX   | 0.019            | 0.918          | Tendency towards co-occurrence( <b>Significant</b> )      |
| KMT2C   | CIC    | 0.09             | -0.764         | Tendency towards mutual exclusivity                       |
| SMARCA4 | DOT1L  | <b>&lt;0.001</b> | 2.903          | Tendency towards co-occurrence( <b>Significant</b> )      |
| ARID1A  | CIC    | 0.0172           | 0.828          | Tendency towards co-occurrence( <b>Significant</b> )      |
| ARID1A  | FUBP1  | 0.064            | 0.762          | Tendency towards co-occurrence                            |
| ARID1A  | NOTCH1 | 0.093            | 0.635          | Tendency towards co-occurrence                            |
| TFPT    | KDM5A  | 0.057            | 0.994          | Tendency towards co-occurrence                            |
| TFPT    | ATRX   | 0.057            | 0.885          | Tendency towards co-occurrence                            |
| TFPT    | CIC    | 0.03             | 0.995          | Tendency towards co-occurrence( <b>Significant</b> )      |
| TFPT    | EGFR   | 0.03             | -Infinity      | Tendency towards mutual exclusivity( <b>Significant</b> ) |
| TFPT    | FUBP1  | 0.308            | 0.455          | Tendency towards co-occurrence                            |
| TFPT    | MYC    | 0.093            | 0.914          | Tendency towards co-occurrence                            |
| TFPT    | TP53   | 0.009            | 1.363          | Tendency towards co-occurrence( <b>Significant</b> )      |
| KDM5A   | ATRX   | <b>&lt;0.001</b> | 1.638          | Tendency towards co-occurrence( <b>Significant</b> )      |
| KDM5A   | MYC    | 0.024            | 0.949          | Tendency towards co-occurrence( <b>Significant</b> )      |
| KDM5A   | TP53   | <b>&lt;0.001</b> | 1.374          | Tendency towards co-occurrence( <b>Significant</b> )      |
| HDAC4   | ATRX   | 0.013            | 1.069          | Tendency towards co-occurrence( <b>Significant</b> )      |
| DOT1L   | CIC    | 0.04             | 0.986          | Tendency towards co-occurrence( <b>Significant</b> )      |
| DOT1L   | MYC    | 0.062            | 1.066          | Tendency towards co-occurrence                            |
| DOT1L   | TP53   | 0.073            | -0.852         | Tendency towards mutual exclusivity                       |
| ATRX    | CDKN2A | 0.008            | -0.879         | Tendency towards mutual exclusivity( <b>Significant</b> ) |

|        |        |                  |        |                                                           |
|--------|--------|------------------|--------|-----------------------------------------------------------|
| ATRX   | CIC    | 0.013            | -0.625 | Tendency towards mutual exclusivity( <b>Significant</b> ) |
| ATRX   | EGFR   | 0.005            | -0.921 | Tendency towards mutual exclusivity( <b>Significant</b> ) |
| ATRX   | FUBP1  | 0.025            | -0.743 | Tendency towards mutual exclusivity( <b>Significant</b> ) |
| ATRX   | MYC    | 0.062            | 0.627  | Tendency towards co-occurrence                            |
| ATRX   | TP53   | <b>&lt;0.001</b> | 2.72   | Tendency towards co-occurrence( <b>Significant</b> )      |
| CDKN2A | CIC    | 0.004            | -1.259 | Tendency towards mutual exclusivity( <b>Significant</b> ) |
| CDKN2A | EGFR   | <b>&lt;0.001</b> | 2.198  | Tendency towards co-occurrence( <b>Significant</b> )      |
| CDKN2A | TP53   | 0.044            | -0.626 | Tendency towards mutual exclusivity( <b>Significant</b> ) |
| CIC    | FUBP1  | <b>&lt;0.001</b> | 1.338  | Tendency towards co-occurrence( <b>Significant</b> )      |
| CIC    | NOTCH1 | <b>&lt;0.001</b> | 1.092  | Tendency towards co-occurrence( <b>Significant</b> )      |
| CIC    | PIK3CA | 0.018            | 0.736  | Tendency towards co-occurrence( <b>Significant</b> )      |
| CIC    | TP53   | <b>&lt;0.001</b> | -1.774 | Tendency towards mutual exclusivity( <b>Significant</b> ) |
| EGFR   | TP53   | <b>&lt;0.001</b> | -1.553 | Tendency towards mutual exclusivity( <b>Significant</b> ) |
| FUBP1  | NOTCH1 | 0.024            | 0.87   | Tendency towards co-occurrence( <b>Significant</b> )      |
| FUBP1  | PIK3CA | 0.003            | 1.13   | Tendency towards co-occurrence( <b>Significant</b> )      |
| FUBP1  | TP53   | 0.002            | -1.104 | Tendency towards mutual exclusivity( <b>Significant</b> ) |
| MYC    | TP53   | 0.023            | 0.813  | Tendency towards co-occurrence( <b>Significant</b> )      |
| NOTCH1 | PIK3CA | 0.06             | 0.654  | Tendency towards co-occurrence                            |
| NOTCH1 | TP53   | 0.004            | -0.89  | Tendency towards mutual exclusivity( <b>Significant</b> ) |
| PIK3CA | TP53   | 0.007            | -0.826 | Tendency towards mutual exclusivity( <b>Significant</b> ) |

### Supplementary Table S2: Epigenetic regulators analyzed.

| Gene   | Gene   | Gene  | Gene  | Gene   | Gene    |
|--------|--------|-------|-------|--------|---------|
| ACTL6A | HDAC1  | JMJD7 | KMT2C | PRMT8  | SMARCA4 |
| ACTL6B | HDAC10 | JMJD8 | KMT2D | PRMT9  | SMARCA5 |
| ACTR5  | HDAC11 | KAT2A | KMT2E | RBBP4  | SMARCC1 |
| ACTR8  | HDAC2  | KAT2B | MBD1  | RBBP7  | SMARCC2 |
| ARID1A | HDAC3  | KAT5  | MBD2  | RING1  | SMARCD1 |
| ARID1B | HDAC4  | KAT6A | MBD3  | RIOX1  | SMARCD2 |
| ASH1L  | HDAC5  | KAT6B | MBD4  | RUVBL1 | SMARCD3 |
| ASH2L  | HDAC6  | KAT7  | MCRS1 | RUVBL2 | SMYD1   |
| ASXL1  | HDAC7  | KAT8  | MECP2 | SETD1A | SMYD2   |
| CARM1  | HDAC8  | KDM1A | MGEA5 | SETD1B | SMYD3   |
| CDY1   | HDAC9  | KDM1B | MINA  | SETD2  | SMYD4   |
| CDYL   | HIF1AN | KDM2A | MTA1  | SETD3  | SMYD5   |
| CHD3   | HINFP  | KDM2B | MTA2  | SETD4  | SUV39H1 |
| CHD4   | HR     | KDM3A | MTA3  | SETD5  | SUV39H2 |

|        |         |       |       |         |       |
|--------|---------|-------|-------|---------|-------|
| CHRAC1 | HSPBAP1 | KDM3B | NAT10 | SETD6   | KMT5A |
| CREBBP | ING1    | KDM4A | NCOA1 | SETD7   | KMT5B |
| DNMT1  | ING2    | KDM4B | NCOA3 | SETD8   | KMT5C |
| DNMT3A | ING3    | KDM4C | NFRKB | SETD9   | TAF1  |
| DNMT3B | ING4    | KDM4D | NSD1  | SETDB1  | TET1  |
| DOT1L  | ING5    | KDM5A | PHF2  | SETDB2  | TET2  |
| EHMT1  | INO80   | KDM5B | PHF8  | SETMAR  | TFPT  |
| EHMT2  | INO80B  | KDM5C | PRDM2 | SIRT1   | UCHL5 |
| ELP3   | INO80C  | KDM5D | PRDM9 | SIRT2   | UTY   |
| EP300  | INO80D  | KDM6A | PRMT1 | SIRT3   | NSD2  |
| EZH1   | INO80E  | KDM6B | PRMT2 | SIRT4   | NSD3  |
| EZH2   | JARID2  | KDM7A | PRMT3 | SIRT5   | YY1   |
| FBXO10 | JMJD1C  | KDM8  | PRMT5 | SIRT6   |       |
| GTF3C4 | JMJD4   | KMT2A | PRMT6 | SIRT7   |       |
| HAT1   | JMJD6   | KMT2B | PRMT7 | SMARCA1 |       |

Footnote: Total = 171 genes.

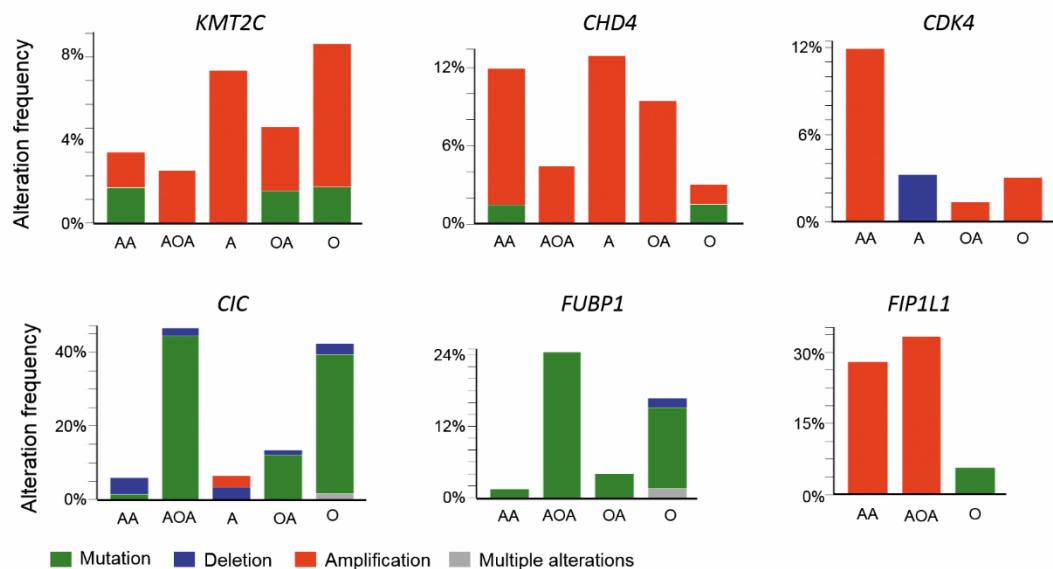

**Supplementary Figure S1.** Frequency of alterations (mutation in green, deletion in blue, amplification in red, and multiple alterations in gray) of genes in glioma subtypes. From left: Anaplastic astrocytoma (AA), Anaplastic oligoastrocytoma (AOA), Astrocytoma (A), Oligoastrocytoma (OA), Oligodendroglioma (O). Database: Brain Lower Grade Glioma (TCGA, provisional). N= 283.

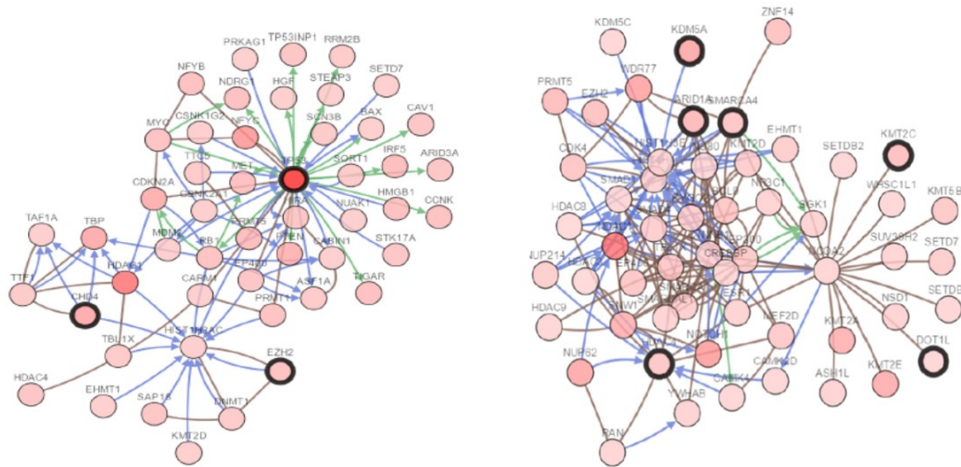

**Supplementary Figure S2.** Network of epigenetic modifiers and neighbors. Left panel: EZH2, CHD4 and TP53 network. Right panel: Epigenetic modifiers KMT2C, SMARCA4, ARID1A, TP53, KDM5A, HDAC4 and DOT1L networking. Blue line: Controls state change of; Green line: Controls expression of; Brown line: In complex with.

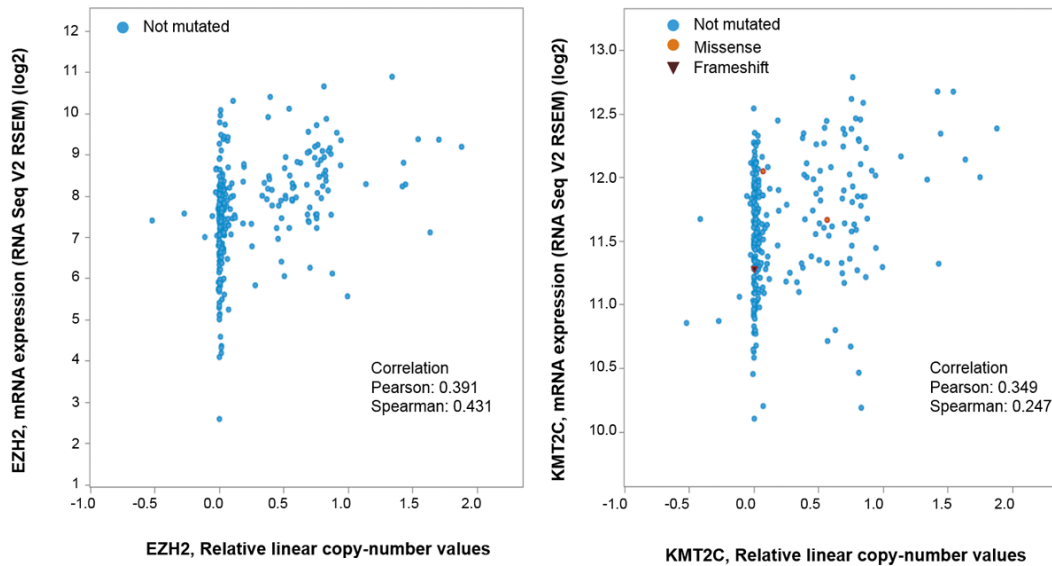

**Supplementary Figure S3.** Copy number alteration (CNA) versus mRNA expression plot. X-axis: relative linear copy-number values. Y-axis: mRNA expression (RNAseq V2 RSEM) (log<sub>2</sub>). Blue dots: not mutated. Red dots: missense mutation. Red triangle: Frame shift. Left panel: EZH2 CNA vs EZH2 mRNA. Right panel: KMT2C CNA vs mRNA.

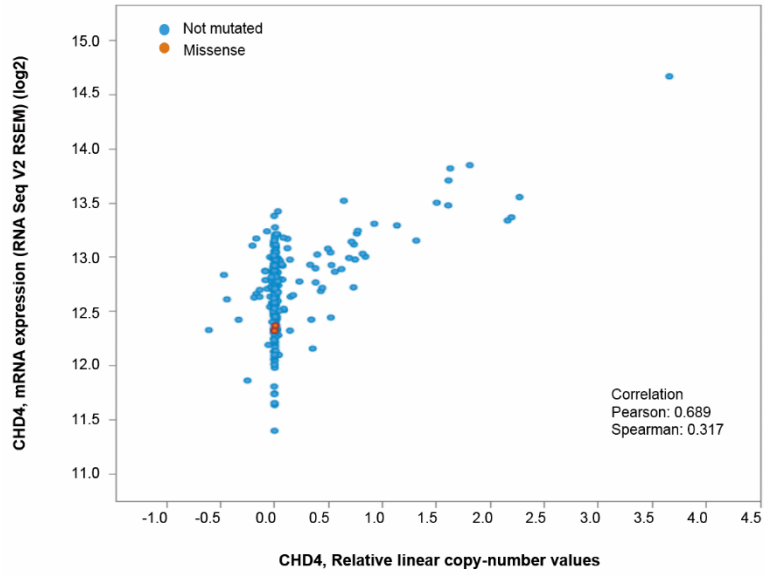

**Supplementary Figure S4.** CHD4 Copy number alteration (CNA) versus mRNA expression plot. X-axis: relative linear copy-number values. Y-axis: mRNA expression (RNAseq V2 RSEM) (log 2). Blue dots: not mutated. Red dots: missense mutation.
